# Supplementary material for: A self-healing supramolecular hydrogel with temperature-responsive fluorescence based on an AIE luminogen
Source: Royal Society of Chemistry journal article supplement (doi:10.1039/c9ra10092j), 2020-01-01
Supplement: c9ra10092j1.pdf [file c9ra10092j1.pdf]

## Electronic Supplementary Information

### A self-healing supramolecular hydrogel with temperature-responsive fluorescence based on AIE luminogen

Botian Li\*, Yichi Zhang, Bo Yan, Da Xiao, Xue Zhou, Junwei Dong, Qiong Zhou\*  
*Department of Materials Science and Engineering, China University of Petroleum-Beijing,  
Beijing, 102249, People's Republic of China*

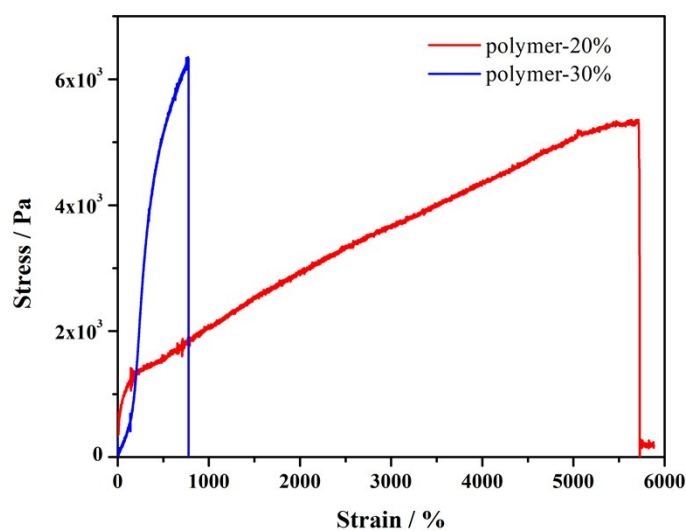

Fig. S1 Tensile curves of TPPE-PAA hydrogels with different polymer concentrations

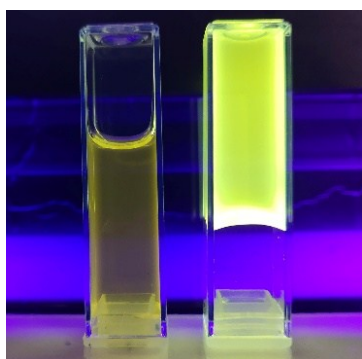

Fig. S2 Fluorescence image of TPPE acetic acid solution (left) and TPPE-PAA gel (right) at 278 K

\* Corresponding authors: E-mail botian.li@cup.edu.cn  
E-mail zhouqiong\_cn@163.com

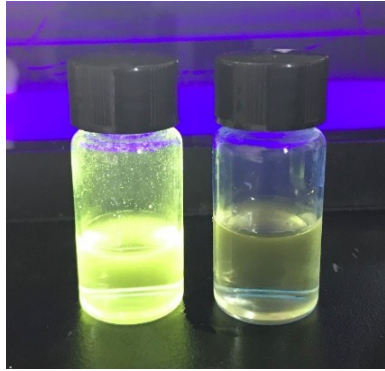

Fig. S3 Fluorescence image of TPPE-PAA solution (left), and TPPE-PAA solution after adding HCl (right)

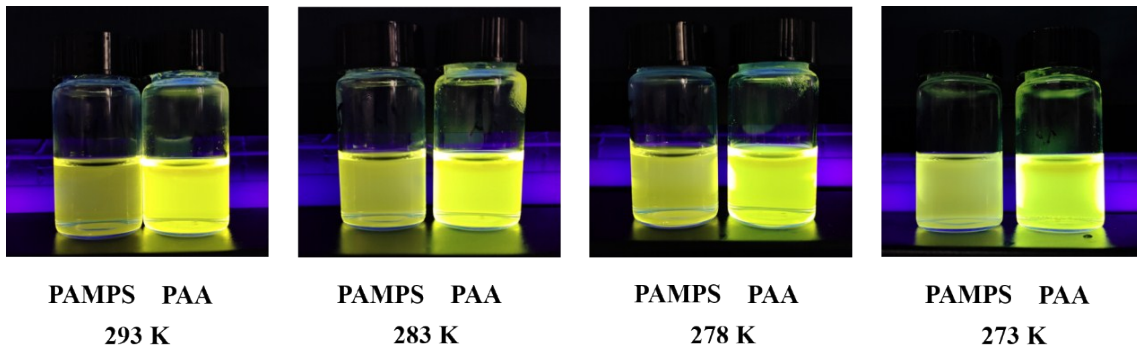

Fig. S4 Fluorescence images of TPPE-PAMPS hydrogel and TPPE-PAA hydrogel at different temperatures under 365 nm UV light

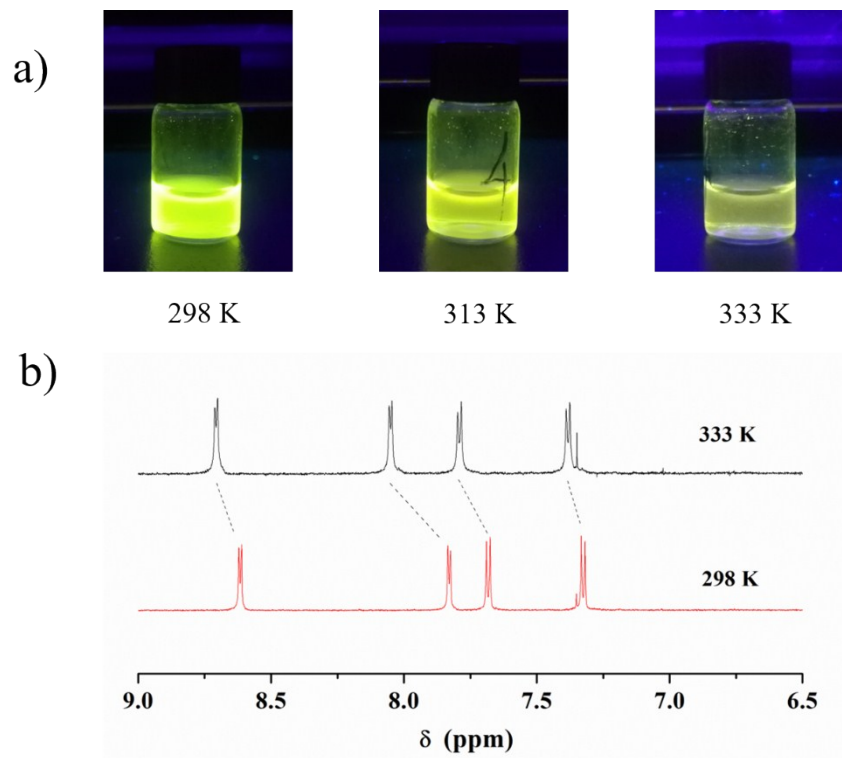

Fig. S5 a) Fluorescence images of TPPE-PAA solution (solvent  $\text{CH}_3\text{OH}/\text{H}_2\text{O}$ : 4/1) at different temperatures under 365 nm UV light; b)  $^1\text{H}$  NMR spectra of TPPE-PAA solution (solvent  $\text{CD}_3\text{OD}/\text{D}_2\text{O}$ : 4/1)
